# Supplementary material for: Clinician- and Patient-Centred Outcomes of Digital Impressions in Infants with Cleft Lip and Palate: A Systematic Review
Source: MDPI journal article supplement (doi:10.3390/children11030343), 2024-03-13
Supplement: s1 [file s1]

## Clinician-and Patient- Centred Outcomes of Digital Impressions in Infants with Cleft Lip and Palate: A Systematic Review

| Database:        | Search Strategy                                                                                                                                                                                                                                                                                                               |
|------------------|-------------------------------------------------------------------------------------------------------------------------------------------------------------------------------------------------------------------------------------------------------------------------------------------------------------------------------|
| Pubmed           | (cleft*[Title/Abstract] AND (lip*[Title/Abstract] OR palate*[Title/Abstract] OR orofacial [Title/Abstract] OR alveolus [Title/Abstract])) AND ((intraoral AND scan*) OR "3 D Scan*" OR "digital model*"OR "digital impression*"3 D model*"OR "digital workflow*"OR "digital work flow "OR "3D))                               |
| Scopus           | TITLE-ABS-KEY (("cleft lip and palate" OR "orofacial cleft*" OR "alveolar cleft") AND (" intraoral scan*" OR "3 d scan*" OR "digital impression" OR "digital workflow" OR " 3d print*" OR "computer aided" OR "CAD")) AND (LIMIT-TO (SUBJAREA, "MEDI") OR LIMIT-TO (SUBJAREA, "DENT")) AND (LIMIT TO (LANGUAGE, "English" ) ) |
| Web of science   | ALL (("cleft lip and palate" OR "orofacial cleft*" OR "alveolar cleft") AND ("intraoral scan*" OR "3 d scan*" OR "digital impression" OR "digital workflow" OR " 3d print*" OR "computer aided"))                                                                                                                             |
| Cochrane Library | ((("cleft lip and palate" OR "orofacial cleft*" OR "alveolar cleft") AND ("intraoral scan*" OR "3 d scan*" OR "digital impression" OR "digital workflow" OR " 3d print*" OR "computer aided" OR "CAD")))                                                                                                                      |
| Embase           | (cleft*[Title/Abstract] AND (lip*[Title/Abstract] OR palate*[Title/Abstract] OR orofacial [Title/Abstract] OR alveolus [Title/Abstract])) AND ((intraoral AND scan*) OR "3 D Scan*" OR "digital model*"OR "digital impression*"3 D model*"OR "digital workflow*"OR "digital work flow "OR "3D))                               |
